# Supplementary material for: A Model-Based Assessment for the Ability of National Nature Reserves to Conserve the Picea Species in China under Predicted Climate Conditions
Source: MDPI journal article supplement (doi:10.3390/su14127406), 2022-06-17
Supplement: s1 [file s1]

Table S1. Five *Picea* species data from field survey and Chinese Virtual Herbarium (CVH; [www.cvh.org.cn](http://www.cvh.org.cn))

| <i>Picea</i> species | Longitude   | Latitude    | Data sources |
|----------------------|-------------|-------------|--------------|
| Sp1                  | 101.932221  | 35.27123    | field survey |
| Sp1                  | 101.931083  | 35.246176   | field survey |
| Sp1                  | 101.932542  | 35.190701   | field survey |
| Sp1                  | 101.935569  | 35.194051   | field survey |
| Sp1                  | 101.938583  | 35.185008   | field survey |
| Sp1                  | 101.938924  | 35.195435   | field survey |
| Sp1                  | 101.939014  | 35.312597   | field survey |
| Sp1                  | 101.942646  | 35.207988   | field survey |
| Sp1                  | 101.9427    | 35.197782   | field survey |
| Sp1                  | 101.946634  | 35.234758   | field survey |
| Sp1                  | 101.947284  | 35.230646   | field survey |
| Sp1                  | 101.947711  | 35.186402   | field survey |
| Sp1                  | 101.949859  | 35.219063   | field survey |
| Sp1                  | 101.951892  | 35.218272   | field survey |
| Sp1                  | 101.952456  | 35.18671    | field survey |
| Sp1                  | 101.952864  | 35.230608   | field survey |
| Sp1                  | 101.95429   | 35.212265   | field survey |
| Sp1                  | 101.955497  | 35.22449    | field survey |
| Sp1                  | 101.957221  | 35.188048   | field survey |
| Sp1                  | 102.0044444 | 29.57333333 | field survey |
| Sp1                  | 102.005     | 29.57305556 | field survey |
| Sp1                  | 102.0375    | 29.57361111 | field survey |
| Sp1                  | 102.0513889 | 29.82805556 | field survey |
| Sp1                  | 102.0558333 | 29.82361111 | field survey |
| Sp1                  | 102.0580556 | 29.81361111 | field survey |
| Sp1                  | 102.0597222 | 29.78055556 | field survey |
| Sp1                  | 102.0605556 | 29.80638889 | field survey |
| Sp1                  | 102.0616667 | 29.79361111 | field survey |
| Sp1                  | 102.0622222 | 29.79444444 | field survey |
| Sp1                  | 102.0630556 | 29.79944444 | field survey |
| Sp1                  | 103.2952778 | 30.68388889 | field survey |
| Sp1                  | 104.9191667 | 29.08944444 | field survey |
| Sp2                  | 100.800554  | 32.784968   | field survey |
| Sp2                  | 100.844536  | 32.795453   | field survey |
| Sp2                  | 100.844639  | 32.794811   | field survey |
| Sp2                  | 100.844747  | 32.794897   | field survey |
| Sp2                  | 100.850525  | 32.802019   | field survey |
| Sp2                  | 100.85125   | 32.804594   | field survey |
| Sp2                  | 100.868769  | 32.706933   | field survey |
| Sp2                  | 100.868909  | 32.706933   | field survey |
| Sp2                  | 100.868924  | 32.706953   | field survey |

---

|     |             |             |              |
|-----|-------------|-------------|--------------|
| Sp2 | 100.868943  | 32.706989   | field survey |
| Sp2 | 100.868943  | 32.706941   | field survey |
| Sp2 | 100.869317  | 32.825353   | field survey |
| Sp2 | 100.883544  | 32.843703   | field survey |
| Sp2 | 100.906669  | 32.734606   | field survey |
| Sp2 | 101.939014  | 35.312597   | field survey |
| Sp1 | -123.25081  | 49.25408    | CVH          |
| Sp1 | -73.643611  | 40.807222   | CVH          |
| Sp1 | 0.50947     | 51.04673    | CVH          |
| Sp1 | 0.62513     | 42.7322     | CVH          |
| Sp1 | 2.26684     | 48.74632    | CVH          |
| Sp1 | 4.315555    | 50.86       | CVH          |
| Sp1 | 4.49701     | 52.160114   | CVH          |
| Sp1 | 90.616667   | 27.516667   | CVH          |
| Sp1 | 90.85       | 27.45       | CVH          |
| Sp1 | 90.866452   | 28.39163462 | CVH          |
| Sp1 | 90.866667   | 27.45       | CVH          |
| Sp1 | 90.933333   | 27.416667   | CVH          |
| Sp1 | 91.17144987 | 28.0867245  | CVH          |
| Sp1 | 91.79900801 | 27.888221   | CVH          |
| Sp1 | 91.96375006 | 27.99700427 | CVH          |
| Sp1 | 94.36805829 | 29.65404218 | CVH          |
| Sp1 | 95.77390012 | 29.86506009 | CVH          |
| Sp1 | 95.78329492 | 29.81903179 | CVH          |
| Sp1 | 97.47326975 | 28.66744414 | CVH          |
| Sp1 | 98.49759504 | 25.02661686 | CVH          |
| Sp1 | 98.50775    | 27.78312    | CVH          |
| Sp1 | 98.515      | 27.714444   | CVH          |
| Sp1 | 98.528611   | 27.789444   | CVH          |
| Sp1 | 98.529444   | 27.789444   | CVH          |
| Sp1 | 98.5347     | 27.7903     | CVH          |
| Sp1 | 98.534722   | 27.790556   | CVH          |
| Sp1 | 98.539722   | 27.711389   | CVH          |
| Sp1 | 98.566111   | 27.770833   | CVH          |
| Sp1 | 98.56666    | 27.8        | CVH          |
| Sp1 | 98.593889   | 27.758056   | CVH          |
| Sp1 | 98.5975     | 27.6322     | CVH          |
| Sp1 | 98.5975     | 27.632222   | CVH          |
| Sp1 | 98.59968548 | 29.68578    | CVH          |
| Sp1 | 98.59968548 | 29.68577612 | CVH          |
| Sp1 | 98.6575     | 27.631944   | CVH          |
| Sp1 | 98.66853    | 27.74088    | CVH          |
| Sp1 | 98.67239945 | 27.74706788 | CVH          |
| Sp1 | 98.7355461  | 27.82295037 | CVH          |

---

---

|     |             |             |     |
|-----|-------------|-------------|-----|
| Sp1 | 98.788056   | 28.470833   | CVH |
| Sp1 | 98.87564942 | 26.90805521 | CVH |
| Sp1 | 98.92445    | 28.47009    | CVH |
| Sp1 | 98.92445266 | 28.47008601 | CVH |
| Sp1 | 99.266667   | 28.1        | CVH |
| Sp1 | 99.29346569 | 27.1831702  | CVH |
| Sp1 | 99.29347    | 27.18317    | CVH |
| Sp1 | 99.37741602 | 25.89194507 | CVH |
| Sp1 | 99.42328467 | 26.4592079  | CVH |
| Sp1 | 99.6        | 27.85       | CVH |
| Sp1 | 99.63383    | 26.19489    | CVH |
| Sp1 | 99.706013   | 27.82308    | CVH |
| Sp1 | 99.70744457 | 27.83576013 | CVH |
| Sp1 | 99.70953    | 27.82518    | CVH |
| Sp1 | 99.722222   | 27.8        | CVH |
| Sp1 | 99.766529   | 29.236023   | CVH |
| Sp1 | 99.83991312 | 28.26407348 | CVH |
| Sp1 | 100.166944  | 27.003611   | CVH |
| Sp1 | 100.229945  | 26.876096   | CVH |
| Sp1 | 100.2324645 | 26.86065744 | CVH |
| Sp1 | 100.2755746 | 30.00003062 | CVH |
| Sp1 | 100.7436046 | 32.93850393 | CVH |
| Sp1 | 100.8385    | 24.45186    | CVH |
| Sp1 | 101.5134157 | 29.0064319  | CVH |
| Sp1 | 101.5154291 | 27.42815487 | CVH |
| Sp1 | 101.67      | 30.02       | CVH |
| Sp1 | 101.8       | 30.9        | CVH |
| Sp1 | 101.8872792 | 29.59938177 | CVH |
| Sp1 | 101.916     | 29.68       | CVH |
| Sp1 | 101.96      | 30.05       | CVH |
| Sp1 | 101.9635552 | 30.00440738 | CVH |
| Sp1 | 101.96483   | 30.055305   | CVH |
| Sp1 | 102.0619444 | 29.77722222 | CVH |
| Sp1 | 102.0622222 | 29.79444444 | CVH |
| Sp1 | 102.065228  | 29.58762898 | CVH |
| Sp1 | 102.088669  | 29.688761   | CVH |
| Sp1 | 102.0951869 | 29.69474179 | CVH |
| Sp1 | 102.17      | 28.54       | CVH |
| Sp1 | 102.1835746 | 28.55529445 | CVH |
| Sp1 | 102.197601  | 29.705801   | CVH |
| Sp1 | 102.234618  | 29.914155   | CVH |
| Sp1 | 102.2414321 | 29.92040166 | CVH |
| Sp1 | 102.2735027 | 27.8877523  | CVH |
| Sp1 | 102.28      | 26.9        | CVH |

---

---

|     |             |             |     |
|-----|-------------|-------------|-----|
| Sp1 | 102.35      | 29.22       | CVH |
| Sp1 | 102.359458  | 29.22787    | CVH |
| Sp1 | 102.3664045 | 29.23430488 | CVH |
| Sp1 | 102.366405  | 29.234305   | CVH |
| Sp1 | 102.3694264 | 31.0022087  | CVH |
| Sp1 | 102.4825    | 31.7992     | CVH |
| Sp1 | 102.5144745 | 28.64582756 | CVH |
| Sp1 | 102.54      | 30.91       | CVH |
| Sp1 | 102.546111  | 30.911944   | CVH |
| Sp1 | 102.5506152 | 32.79660528 | CVH |
| Sp1 | 102.75      | 30.06       | CVH |
| Sp1 | 102.758313  | 30.066708   | CVH |
| Sp1 | 102.7645302 | 30.07247295 | CVH |
| Sp1 | 102.8025    | 30.38173    | CVH |
| Sp1 | 102.81      | 30.36       | CVH |
| Sp1 | 102.81464   | 30.368117   | CVH |
| Sp1 | 102.8214842 | 30.37408211 | CVH |
| Sp1 | 102.8214842 | 30.07247295 | CVH |
| Sp1 | 102.8363896 | 36.3255614  | CVH |
| Sp1 | 102.8534355 | 29.79919351 | CVH |
| Sp1 | 102.961829  | 33.57587    | CVH |
| Sp1 | 102.9743907 | 33.58437665 | CVH |
| Sp1 | 103         | 30          | CVH |
| Sp1 | 103.016667  | 30.016667   | CVH |
| Sp1 | 103.033333  | 30.016667   | CVH |
| Sp1 | 103.0531836 | 30.9678997  | CVH |
| Sp1 | 103.08      | 30.83       | CVH |
| Sp1 | 103.1385858 | 28.33401962 | CVH |
| Sp1 | 103.148639  | 29.160369   | CVH |
| Sp1 | 103.1735114 | 31.44255044 | CVH |
| Sp1 | 103.26      | 31.08       | CVH |
| Sp1 | 103.267     | 31.084      | CVH |
| Sp1 | 103.2685773 | 29.23608911 | CVH |
| Sp1 | 103.33      | 31.22       | CVH |
| Sp1 | 103.35      | 34.69       | CVH |
| Sp1 | 103.3605333 | 34.69863941 | CVH |
| Sp1 | 103.39      | 29.49       | CVH |
| Sp1 | 103.45      | 28.82       | CVH |
| Sp1 | 103.4915456 | 29.60697553 | CVH |
| Sp1 | 103.517     | 31.375      | CVH |
| Sp1 | 103.54277   | 28.84027    | CVH |
| Sp1 | 103.571742  | 28.262715   | CVH |
| Sp1 | 103.5784287 | 28.26895062 | CVH |
| Sp1 | 103.59025   | 31.47677    | CVH |

---

---

|     |             |             |     |
|-----|-------------|-------------|-----|
| Sp1 | 103.5965179 | 31.48300532 | CVH |
| Sp1 | 103.59895   | 32.637983   | CVH |
| Sp1 | 103.6105797 | 32.66179656 | CVH |
| Sp1 | 103.612264  | 30.996299   | CVH |
| Sp1 | 103.627971  | 36.088454   | CVH |
| Sp1 | 103.6345801 | 36.09410937 | CVH |
| Sp1 | 103.6345801 | 36.0941094  | CVH |
| Sp1 | 103.6535336 | 30.99425689 | CVH |
| Sp1 | 103.6794334 | 30.63659589 | CVH |
| Sp1 | 103.853481  | 31.68115    | CVH |
| Sp1 | 103.8595898 | 31.6868094  | CVH |
| Sp1 | 103.8656011 | 35.40058704 | CVH |
| Sp1 | 103.891767  | 36.519977   | CVH |
| Sp1 | 104.23      | 33.26       | CVH |
| Sp1 | 104.2495467 | 33.25759151 | CVH |
| Sp1 | 104.37749   | 33.79081497 | CVH |
| Sp1 | 104.37749   | 36.06546489 | CVH |
| Sp1 | 104.5354215 | 32.41468198 | CVH |
| Sp1 | 104.55      | 32.44       | CVH |
| Sp1 | 104.553645  | 32.445845   | CVH |
| Sp1 | 104.683377  | 32.943816   | CVH |
| Sp1 | 104.6895584 | 32.94960128 | CVH |
| Sp1 | 105.238187  | 32.584256   | CVH |
| Sp1 | 105.2454071 | 32.58161686 | CVH |
| Sp1 | 106.5225578 | 33.91658302 | CVH |
| Sp1 | 108.314391  | 33.31033    | CVH |
| Sp1 | 108.320564  | 33.31655549 | CVH |
| Sp1 | 108.6       | 31.95       | CVH |
| Sp1 | 108.62      | 31.82       | CVH |
| Sp1 | 108.664     | 31.947      | CVH |
| Sp1 | 108.664     | 31.952      | CVH |
| Sp1 | 108.66426   | 31.9477     | CVH |
| Sp1 | 108.6716116 | 31.95339075 | CVH |
| Sp1 | 108.73139   | 31.88445    | CVH |
| Sp1 | 108.9086154 | 32.31288078 | CVH |
| Sp1 | 109.36      | 32.38       | CVH |
| Sp1 | 109.3685467 | 32.39480412 | CVH |
| Sp1 | 109.479425  | 30.295026   | CVH |
| Sp1 | 109.4865503 | 30.30103714 | CVH |
| Sp1 | 110.34      | 31.04       | CVH |
| Sp1 | 110.340757  | 31.042327   | CVH |
| Sp1 | 110.3475753 | 31.04806425 | CVH |
| Sp1 | 110.6061364 | 31.7863978  | CVH |
| Sp1 | 110.7534461 | 31.35446352 | CVH |

---

---

|     |             |             |     |
|-----|-------------|-------------|-----|
| Sp1 | 110.78      | 31.33       | CVH |
| Sp1 | 110.783719  | 31.331599   | CVH |
| Sp1 | 111.28723   | 30.69348    | CVH |
| Sp1 | 111.6224267 | 33.79182246 | CVH |
| Sp1 | 111.8554253 | 33.05120311 | CVH |
| Sp1 | 112.540918  | 32.999082   | CVH |
| Sp1 | 112.914434  | 33.74487886 | CVH |
| Sp1 | 113.166529  | 30.663372   | CVH |
| Sp1 | 113.6041079 | 39.01503609 | CVH |
| Sp1 | 113.987     | 22.54995    | CVH |
| Sp1 | 114.075031  | 32.123274   | CVH |
| Sp1 | 115.99      | 29.61       | CVH |
| Sp1 | 115.994452  | 29.55227598 | CVH |
| Sp1 | 116.0075349 | 29.71134056 | CVH |
| Sp1 | 116.0514259 | 29.45453917 | CVH |
| Sp1 | 117.1422876 | 39.22902269 | CVH |
| Sp1 | 120.675     | 24.12404    | CVH |
| Sp1 | 126.886927  | 54.095105   | CVH |
| Sp1 | 127.076111  | 53.992281   | CVH |
| Sp1 | 127.390357  | 53.863534   | CVH |
| Sp1 | 129.15      | 56.866667   | CVH |
| Sp1 | 129.338092  | 51.966422   | CVH |
| Sp1 | 130.033333  | 53.816667   | CVH |
| Sp1 | 130.733333  | 55.65       | CVH |
| Sp1 | 132.453798  | 43.651652   | CVH |
| Sp1 | 132.801128  | 48.836966   | CVH |
| Sp1 | 132.930431  | 43.889936   | CVH |
| Sp1 | 132.952943  | 43.743827   | CVH |
| Sp1 | 133.808054  | 42.863697   | CVH |
| Sp1 | 133.96091   | 55.80631    | CVH |
| Sp1 | 134.058008  | 43.18613    | CVH |
| Sp1 | 134.10312   | 43.113388   | CVH |
| Sp1 | 134.11548   | 43.109091   | CVH |
| Sp1 | 134.14507   | 43.678347   | CVH |
| Sp1 | 134.3       | 52.133333   | CVH |
| Sp1 | 134.416667  | 51.516667   | CVH |
| Sp1 | 134.416667  | 51.883333   | CVH |
| Sp1 | 134.416667  | 52.116667   | CVH |
| Sp1 | 134.43532   | 43.734121   | CVH |
| Sp1 | 134.5       | 51.7        | CVH |
| Sp1 | 134.516667  | 51.883333   | CVH |
| Sp1 | 134.65      | 51.61666    | CVH |
| Sp1 | 134.85      | 52          | CVH |
| Sp1 | 134.866667  | 52.066667   | CVH |

---

---

|     |             |             |     |
|-----|-------------|-------------|-----|
| Sp1 | 134.875     | 52.066667   | CVH |
| Sp1 | 135.085659  | 44.426057   | CVH |
| Sp1 | 135.572529  | 54.594842   | CVH |
| Sp1 | 138.171077  | 56.464767   | CVH |
| Sp1 | 140.721179  | 53.133348   | CVH |
| Sp1 | 141.9621    | 53.45925    | CVH |
| Sp1 | 145.583611  | 43.915207   | CVH |
| Sp1 | 158.006104  | 54.17701    | CVH |
| Sp1 | 159.672203  | 55.441674   | CVH |
| Sp1 | 159.7649    | 55.642918   | CVH |
| Sp1 | 159.869957  | 56.049609   | CVH |
| Sp1 | 161.026268  | 56.958642   | CVH |
| Sp2 | 2.26684     | 48.74632    | CVH |
| Sp2 | 90.82       | 28.2        | CVH |
| Sp2 | 90.866452   | 28.39163462 | CVH |
| Sp2 | 91.79900801 | 27.88822101 | CVH |
| Sp2 | 91.96375006 | 27.99700427 | CVH |
| Sp2 | 95.76       | 29.85       | CVH |
| Sp2 | 95.77390012 | 29.86506009 | CVH |
| Sp2 | 95.78329492 | 29.81903179 | CVH |
| Sp2 | 97.46       | 28.66       | CVH |
| Sp2 | 97.47326975 | 28.66744414 | CVH |
| Sp2 | 98.4089     | 27.8806     | CVH |
| Sp2 | 98.490007   | 25.020615   | CVH |
| Sp2 | 98.49759504 | 25.02661686 | CVH |
| Sp2 | 98.50774662 | 27.78311614 | CVH |
| Sp2 | 98.529333   | 27.789556   | CVH |
| Sp2 | 98.59968548 | 29.68577612 | CVH |
| Sp2 | 98.66582    | 27.740736   | CVH |
| Sp2 | 98.666667   | 26          | CVH |
| Sp2 | 98.666667   | 28          | CVH |
| Sp2 | 98.666667   | 28.333333   | CVH |
| Sp2 | 98.72796063 | 28.32260339 | CVH |
| Sp2 | 98.7355461  | 27.82295037 | CVH |
| Sp2 | 98.78916    | 28.39       | CVH |
| Sp2 | 98.7925     | 28.38972    | CVH |
| Sp2 | 98.866667   | 27.1        | CVH |
| Sp2 | 98.866667   | 27.833333   | CVH |
| Sp2 | 98.87666    | 28.53388    | CVH |
| Sp2 | 98.87916    | 28.53722    | CVH |
| Sp2 | 98.911543   | 28.48611    | CVH |
| Sp2 | 98.92445266 | 28.47008601 | CVH |
| Sp2 | 98.933333   | 27.5        | CVH |
| Sp2 | 98.933333   | 28.583333   | CVH |

---

---

|     |             |             |     |
|-----|-------------|-------------|-----|
| Sp2 | 99.28       | 28.71       | CVH |
| Sp2 | 99.28717    | 27.177166   | CVH |
| Sp2 | 99.2929842  | 28.71878005 | CVH |
| Sp2 | 99.29346569 | 27.1831702  | CVH |
| Sp2 | 99.371048   | 25.885664   | CVH |
| Sp2 | 99.416689   | 26.453601   | CVH |
| Sp2 | 99.42328467 | 26.4592079  | CVH |
| Sp2 | 99.633333   | 27.2        | CVH |
| Sp2 | 99.666667   | 26.666667   | CVH |
| Sp2 | 99.706013   | 27.82308    | CVH |
| Sp2 | 99.70744457 | 27.83576013 | CVH |
| Sp2 | 99.70952999 | 27.82518468 | CVH |
| Sp2 | 99.79       | 28.93       | CVH |
| Sp2 | 99.9        | 25.5        | CVH |
| Sp2 | 99.9        | 25.6        | CVH |
| Sp2 | 100.188847  | 26.952653   | CVH |
| Sp2 | 100.229945  | 26.876096   | CVH |
| Sp2 | 100.2324645 | 26.86065744 | CVH |
| Sp2 | 100.3044616 | 29.04312156 | CVH |
| Sp2 | 100.709787  | 24.615701   | CVH |
| Sp2 | 100.883544  | 32.843703   | CVH |
| Sp2 | 100.901911  | 32.716881   | CVH |
| Sp2 | 101.279419  | 27.928607   | CVH |
| Sp2 | 101.286397  | 27.93459856 | CVH |
| Sp2 | 101.3       | 27.833333   | CVH |
| Sp2 | 101.52      | 27.43       | CVH |
| Sp2 | 101.666667  | 27.5        | CVH |
| Sp2 | 101.855074  | 26.683211   | CVH |
| Sp2 | 101.8604985 | 26.68876748 | CVH |
| Sp2 | 101.8788828 | 29.21117699 | CVH |
| Sp2 | 101.96483   | 30.055305   | CVH |
| Sp2 | 102.03      | 30.05       | CVH |
| Sp2 | 102.05      | 30.05       | CVH |
| Sp2 | 102.0580556 | 29.81361111 | CVH |
| Sp2 | 102.0706104 | 31.48200595 | CVH |
| Sp2 | 102.17      | 28.54       | CVH |
| Sp2 | 102.1835746 | 28.55529445 | CVH |
| Sp2 | 102.234618  | 29.914155   | CVH |
| Sp2 | 102.2414321 | 29.92040166 | CVH |
| Sp2 | 102.2414321 | 29.58762898 | CVH |
| Sp2 | 102.265266  | 27.897245   | CVH |
| Sp2 | 102.2714838 | 27.9005809  | CVH |
| Sp2 | 102.2735027 | 27.8877523  | CVH |
| Sp2 | 102.35      | 29.22       | CVH |

---



---

|     |             |             |     |
|-----|-------------|-------------|-----|
| Sp2 | 102.359458  | 29.22787    | CVH |
| Sp2 | 102.3664045 | 29.23430488 | CVH |
| Sp2 | 102.4740464 | 24.91773479 | CVH |
| Sp2 | 102.507677  | 28.6398     | CVH |
| Sp2 | 102.5144745 | 28.64582756 | CVH |
| Sp2 | 102.5259251 | 30.70134906 | CVH |
| Sp2 | 102.54      | 30.91       | CVH |
| Sp2 | 102.546111  | 30.911944   | CVH |
| Sp2 | 102.7164161 | 25.05156227 | CVH |
| Sp2 | 102.75      | 30.06       | CVH |
| Sp2 | 102.758313  | 30.066708   | CVH |
| Sp2 | 102.7645302 | 30.07247295 | CVH |
| Sp2 | 102.81      | 30.36       | CVH |
| Sp2 | 102.81056   | 30.37028    | CVH |
| Sp2 | 102.81399   | 30.36966    | CVH |
| Sp2 | 102.81453   | 30.36813    | CVH |
| Sp2 | 102.81464   | 30.368117   | CVH |
| Sp2 | 102.8214842 | 30.37408211 | CVH |
| Sp2 | 103.08      | 29.37       | CVH |
| Sp2 | 103.132181  | 28.328636   | CVH |
| Sp2 | 103.1385858 | 28.33401962 | CVH |
| Sp2 | 103.148639  | 29.160369   | CVH |
| Sp2 | 103.1735114 | 31.44255044 | CVH |
| Sp2 | 103.2343397 | 25.23850582 | CVH |
| Sp2 | 103.248771  | 27.696857   | CVH |
| Sp2 | 103.254549  | 27.70214451 | CVH |
| Sp2 | 103.267     | 31.084      | CVH |
| Sp2 | 103.2685773 | 29.23608911 | CVH |
| Sp2 | 103.39      | 29.49       | CVH |
| Sp2 | 103.398589  | 29.496119   | CVH |
| Sp2 | 103.43      | 31.03       | CVH |
| Sp2 | 103.4915456 | 29.60697553 | CVH |
| Sp2 | 103.571742  | 28.262715   | CVH |
| Sp2 | 103.5784287 | 28.26895062 | CVH |
| Sp2 | 103.5965179 | 31.48300532 | CVH |
| Sp2 | 103.891767  | 36.519977   | CVH |
| Sp2 | 104.3615856 | 31.9630841  | CVH |
| Sp2 | 104.37749   | 33.79081497 | CVH |
| Sp2 | 104.5354215 | 32.41468198 | CVH |
| Sp2 | 104.553645  | 32.445845   | CVH |
| Sp2 | 108.6716116 | 31.95339075 | CVH |
| Sp2 | 113.129248  | 34.70973379 | CVH |
| Sp2 | 113.9869559 | 22.54994881 | CVH |
| Sp2 | 114.7042432 | 23.73962418 | CVH |

---

---

|     |             |             |     |
|-----|-------------|-------------|-----|
| Sp2 | 117.2584239 | 34.25908669 | CVH |
| Sp2 | 120.6750281 | 24.12403697 | CVH |
| Sp3 | 107.1055851 | 29.1634786  | CVH |
| Sp3 | 87.63347321 | 43.7992381  | CVH |
| Sp3 | 106.2596046 | 38.28300154 | CVH |
| Sp3 | 108.2544268 | 33.04460211 | CVH |
| Sp3 | 115.994452  | 29.55227598 | CVH |
| Sp3 | 116.0094477 | 29.70981422 | CVH |
| Sp3 | 97.0153764  | 32.99956    | CVH |
| Sp3 | 96.48691827 | 32.20919437 | CVH |
| Sp3 | 94.23124276 | 29.22929934 | CVH |
| Sp3 | 94.21993858 | 29.22091654 | CVH |
| Sp3 | 98.59968548 | 29.68577612 | CVH |
| Sp3 | 93.40892438 | 28.85749454 | CVH |
| Sp3 | 97.47326975 | 28.66744414 | CVH |
| Sp3 | 94.36805829 | 29.65404218 | CVH |
| Sp3 | 95.77390012 | 29.86506009 | CVH |
| Sp3 | 93.08136823 | 29.05190242 | CVH |
| Sp3 | 96.92436045 | 30.05902899 | CVH |
| Sp3 | 91.96375006 | 27.99700427 | CVH |
| Sp3 | 95.78289072 | 29.85836103 | CVH |
| Sp3 | 91.12399287 | 29.65459435 | CVH |
| Sp3 | 95.60264384 | 31.41840296 | CVH |
| Sp3 | 97.17958359 | 31.14734655 | CVH |
| Sp3 | 96.60671719 | 31.21779311 | CVH |
| Sp3 | 96.92436    | 30.059029   | CVH |
| Sp3 | 98.29577328 | 31.67779714 | CVH |
| Sp3 | 97.84736683 | 29.67684854 | CVH |
| Sp3 | 91.12434213 | 29.65289365 | CVH |
| Sp3 | 93.2524198  | 29.89136762 | CVH |
| Sp3 | 98.27733413 | 30.86596696 | CVH |
| Sp3 | 91.12082392 | 29.65004027 | CVH |
| Sp3 | 99.29346569 | 27.1831702  | CVH |
| Sp3 | 100.2324645 | 26.86065744 | CVH |
| Sp3 | 100.2435273 | 26.8273918  | CVH |
| Sp3 | 99.70744457 | 27.83576013 | CVH |
| Sp3 | 98.92445266 | 28.47008601 | CVH |
| Sp3 | 120.6750281 | 24.12403697 | CVH |
| Sp3 | 98.82675241 | 28.19735521 | CVH |
| Sp3 | 113.3231761 | 23.12820067 | CVH |
| Sp3 | 98.80672792 | 28.48791499 | CVH |
| Sp3 | 121.8569432 | 31.35154796 | CVH |
| Sp3 | 120.6750281 | 24.91773479 | CVH |
| Sp3 | 120.2161811 | 23.01344702 | CVH |

---

---

|     |             |             |     |
|-----|-------------|-------------|-----|
| Sp3 | 99.83991312 | 28.26407348 | CVH |
| Sp3 | 99.37741602 | 25.89194507 | CVH |
| Sp3 | 99.70953    | 27.82518    | CVH |
| Sp3 | 100.0449096 | 27.502907   | CVH |
| Sp3 | 100.8585904 | 27.28772783 | CVH |
| Sp3 | 100.2402577 | 26.87864065 | CVH |
| Sp3 | 101.286397  | 27.93459856 | CVH |
| Sp3 | 102.7978161 | 31.67912554 | CVH |
| Sp3 | 101.5134157 | 29.0064319  | CVH |
| Sp3 | 102.3694264 | 31.0022087  | CVH |
| Sp3 | 100.3044616 | 29.04312156 | CVH |
| Sp3 | 99.1167267  | 30.01166171 | CVH |
| Sp3 | 99.80505957 | 28.93673348 | CVH |
| Sp3 | 103.1735114 | 31.44255    | CVH |
| Sp3 | 102.0706104 | 31.48200595 | CVH |
| Sp3 | 101.9635552 | 30.00440738 | CVH |
| Sp3 | 101.7136097 | 32.90822092 | CVH |
| Sp3 | 101.0205004 | 30.03756897 | CVH |
| Sp3 | 102.7785965 | 28.96482319 | CVH |
| Sp3 | 102.3664045 | 29.23430488 | CVH |
| Sp3 | 99.2929842  | 28.71878005 | CVH |
| Sp3 | 101.8964371 | 30.8847698  | CVH |
| Sp3 | 100.2755746 | 30.00003062 | CVH |
| Sp3 | 101.5154291 | 27.42815487 | CVH |
| Sp3 | 102.1835746 | 28.55529445 | CVH |
| Sp3 | 101.1315403 | 30.98532628 | CVH |
| Sp3 | 102.8214842 | 30.07247295 | CVH |
| Sp3 | 100.34589   | 28.46027605 | CVH |
| Sp3 | 103.3956132 | 35.66932973 | CVH |
| Sp3 | 100.7073622 | 31.54182673 | CVH |
| Sp3 | 102.2135021 | 31.91174796 | CVH |
| Sp3 | 102.8214842 | 30.37408211 | CVH |
| Sp3 | 104.5354215 | 32.41468198 | CVH |
| Sp3 | 100.3044616 | 100.3044616 | CVH |
| Sp3 | 101.8872792 | 29.59938177 | CVH |
| Sp3 | 103.0396913 | 29.7407859  | CVH |
| Sp3 | 101.9685467 | 30.05527884 | CVH |
| Sp3 | 107.9345709 | 35.50793297 | CVH |
| Sp3 | 102.700013  | 25.012526   | CVH |
| Sp3 | 100.229945  | 26.876096   | CVH |
| Sp3 | 100.261612  | 27.080156   | CVH |
| Sp3 | 100.349619  | 27.111409   | CVH |
| Sp3 | 100.208     | 27.1681     | CVH |
| Sp3 | 99.28717    | 27.177166   | CVH |

---

---

|     |            |           |     |
|-----|------------|-----------|-----|
| Sp3 | 99.4099    | 27.2229   | CVH |
| Sp3 | 100.85195  | 27.2822   | CVH |
| Sp3 | 101.5      | 27.42     | CVH |
| Sp3 | 99.6851    | 27.6271   | CVH |
| Sp3 | 99.706013  | 27.82308  | CVH |
| Sp3 | 101.27     | 27.92     | CVH |
| Sp3 | 101.279419 | 27.928607 | CVH |
| Sp3 | 98.911543  | 28.48611  | CVH |
| Sp3 | 102.17     | 28.54     | CVH |
| Sp3 | 102.177079 | 28.549809 | CVH |
| Sp3 | 99.28      | 28.71     | CVH |
| Sp3 | 99.286333  | 28.713041 | CVH |
| Sp3 | 99.79      | 28.93     | CVH |
| Sp3 | 99.79929   | 28.932073 | CVH |
| Sp3 | 102.771746 | 28.966068 | CVH |
| Sp3 | 101.5      | 29        | CVH |
| Sp3 | 101.507299 | 29.000343 | CVH |
| Sp3 | 100.298406 | 29.037008 | CVH |
| Sp3 | 93.07      | 29.04     | CVH |
| Sp3 | 93.9       | 29.13     | CVH |
| Sp3 | 102.359458 | 29.22787  | CVH |
| Sp3 | 94.63      | 29.45     | CVH |
| Sp3 | 94.5436    | 29.565    | CVH |
| Sp3 | 94.5428    | 29.5652   | CVH |
| Sp3 | 94.54      | 29.57     | CVH |
| Sp3 | 91.12      | 29.65     | CVH |
| Sp3 | 98.593111  | 29.679906 | CVH |
| Sp3 | 94.7172    | 29.8186   | CVH |
| Sp3 | 95.76      | 29.85     | CVH |
| Sp3 | 93.24      | 29.88     | CVH |
| Sp3 | 101.96     | 30.05     | CVH |
| Sp3 | 96.91      | 30.05     | CVH |
| Sp3 | 101.96483  | 30.055305 | CVH |
| Sp3 | 101.89     | 30.87     | CVH |
| Sp3 | 102.546111 | 30.911944 | CVH |
| Sp3 | 102.36     | 30.99     | CVH |
| Sp3 | 102.206261 | 31.905842 | CVH |
| Sp3 | 96.22      | 32.27     | CVH |
| Sp3 | 96.67      | 32.77     | CVH |
| Sp3 | 106.253125 | 38.277304 | CVH |
| Sp3 | 98.222222  | 25.543333 | CVH |
| Sp3 | 98.768611  | 27.1725   | CVH |
| Sp3 | 98.749444  | 27.176389 | CVH |
| Sp3 | 98.5775    | 27.608889 | CVH |

---

---

|     |            |           |     |
|-----|------------|-----------|-----|
| Sp3 | 98.5975    | 27.632222 | CVH |
| Sp3 | 98.597778  | 27.632222 | CVH |
| Sp3 | 98.515     | 27.714444 | CVH |
| Sp3 | 98.502222  | 27.715    | CVH |
| Sp3 | 98.593889  | 27.758056 | CVH |
| Sp3 | 98.578611  | 27.763056 | CVH |
| Sp3 | 98.603333  | 27.765833 | CVH |
| Sp3 | 98.566389  | 27.770833 | CVH |
| Sp3 | 98.550278  | 27.782222 | CVH |
| Sp3 | 98.529444  | 27.789444 | CVH |
| Sp3 | 98.409     | 27.8807   | CVH |
| Sp3 | 99.722222  | 27.8      | CVH |
| Sp3 | 101.1      | 28.4      | CVH |
| Sp3 | 105        | 35        | CVH |
| Sp3 | -90.259783 | 38.611233 | CVH |
| Sp3 | 30.3       | 59.9      | CVH |
| Sp3 | 102.28     | 26.9      | CVH |
| Sp3 | 100.33     | 27.17     | CVH |
| Sp3 | 100.179889 | 26.850444 | CVH |
| Sp3 | 100.22775  | 26.85505  | CVH |
| Sp3 | 100.38757  | 26.88533  | CVH |
| Sp3 | 100        | 27        | CVH |
| Sp3 | 100.519    | 27.263    | CVH |
| Sp3 | 100.136111 | 27.382778 | CVH |
| Sp3 | 100.138333 | 27.383056 | CVH |
| Sp3 | 100.031944 | 27.635    | CVH |
| Sp3 | 99.95      | 27.733889 | CVH |
| Sp3 | 99.7175    | 27.8      | CVH |
| Sp3 | 99.133333  | 28.3      | CVH |
| Sp3 | 99.766667  | 28.383333 | CVH |
| Sp3 | 107.1      | 28.4      | CVH |
| Sp3 | 98.85      | 28.466667 | CVH |
| Sp3 | 99.75      | 28.95     | CVH |
| Sp3 | 101.95715  | 29.99844  | CVH |
| Sp3 | 103        | 30        | CVH |
| Sp3 | 100        | 30        | CVH |
| Sp3 | 101.955    | 30.012    | CVH |
| Sp3 | 101.96514  | 30.02742  | CVH |
| Sp3 | 101.96028  | 30.05111  | CVH |
| Sp3 | 104.07593  | 30.65165  | CVH |
| Sp3 | 102        | 31        | CVH |
| Sp3 | 0.62513    | 42.7322   | CVH |
| Sp3 | -123.25081 | 49.25408  | CVH |
| Sp3 | 100.259167 | 27.072778 | CVH |

---

---

|     |             |             |     |
|-----|-------------|-------------|-----|
| Sp3 | 100.244361  | 28.517181   | CVH |
| Sp3 | 100.4975    | 29.734722   | CVH |
| Sp3 | 100.497611  | 29.734806   | CVH |
| Sp3 | 99.8545     | 29.846889   | CVH |
| Sp3 | 99.854444   | 29.846944   | CVH |
| Sp3 | 100.813583  | 30.031528   | CVH |
| Sp3 | 100.813611  | 30.031667   | CVH |
| Sp3 | 175.966851  | -39.881593  | CVH |
| Sp3 | 93.9        | 29.03       | CVH |
| Sp3 | 93.93       | 29.05       | CVH |
| Sp3 | 94.92       | 29.58       | CVH |
| Sp3 | 93.93       | 30          | CVH |
| Sp3 | 98.810556   | 28.383611   | CVH |
| Sp4 | 123.4710966 | 41.68383    | CVH |
| Sp4 | 109.5764026 | 31.40488    | CVH |
| Sp4 | 98.92445266 | 28.47009    | CVH |
| Sp4 | 99.70744457 | 27.83576013 | CVH |
| Sp4 | 97.0153764  | 32.99956    | CVH |
| Sp4 | 100.7436046 | 32.9385     | CVH |
| Sp4 | 94.7488939  | 29.94242862 | CVH |
| Sp4 | 98.59968548 | 29.68578    | CVH |
| Sp4 | 97.84736683 | 29.67684854 | CVH |
| Sp4 | 97.17958359 | 31.14734655 | CVH |
| Sp4 | 98.22459452 | 31.50521    | CVH |
| Sp4 | 97.57512368 | 30.65986    | CVH |
| Sp4 | 96.92436045 | 30.05903    | CVH |
| Sp4 | 97.47326975 | 28.66744    | CVH |
| Sp4 | 93.79217296 | 31.89242    | CVH |
| Sp4 | 95.83130661 | 30.74713    | CVH |
| Sp4 | 93.68596594 | 31.48636    | CVH |
| Sp4 | 98.27733413 | 30.86597    | CVH |
| Sp4 | 97.47326975 | 29.65289    | CVH |
| Sp4 | 91.12399287 | 29.65459    | CVH |
| Sp4 | 94.36805829 | 29.65404218 | CVH |
| Sp4 | 96.60671719 | 31.21779    | CVH |
| Sp4 | 101.4355918 | 29.05206    | CVH |
| Sp4 | 101.4118363 | 29.16047    | CVH |
| Sp4 | 99.80505957 | 28.93673348 | CVH |
| Sp4 | 101.5134157 | 29.00643    | CVH |
| Sp4 | 100.3183982 | 30.94547    | CVH |
| Sp4 | 100.9855835 | 32.27109    | CVH |
| Sp4 | 102.3694264 | 31.00221    | CVH |
| Sp4 | 100.6823969 | 31.39799    | CVH |
| Sp4 | 100.3394136 | 32.27433    | CVH |

---

---

|     |             |             |     |
|-----|-------------|-------------|-----|
| Sp4 | 98.58740161 | 31.81211    | CVH |
| Sp4 | 101.0205004 | 30.03757    | CVH |
| Sp4 | 103.1735114 | 31.44255    | CVH |
| Sp4 | 102.3664045 | 29.2343     | CVH |
| Sp4 | 101.9635552 | 30.00441    | CVH |
| Sp4 | 100.2755746 | 30.00003    | CVH |
| Sp4 | 98.83110022 | 31.21531    | CVH |
| Sp4 | 101.1315403 | 30.98532628 | CVH |
| Sp4 | 101.8964371 | 30.88477    | CVH |
| Sp4 | 100.3044616 | 29.04312    | CVH |
| Sp4 | 98.10948062 | 32.984      | CVH |
| Sp4 | 99.1167267  | 30.01166    | CVH |
| Sp4 | 102.9965174 | 32.06781    | CVH |
| Sp4 | 99.99921035 | 31.62896    | CVH |
| Sp4 | 101.5154291 | 27.42815    | CVH |
| Sp4 | 102.0706104 | 31.48201    | CVH |
| Sp4 | 100.34589   | 28.46027605 | CVH |
| Sp4 | 102.8214842 | 30.37408    | CVH |
| Sp4 | 102.5506152 | 32.79661    | CVH |
| Sp4 | 98.109481   | 32.984003   | CVH |
| Sp4 | 101.0205004 | 30.00441    | CVH |
| Sp4 | 104.0815335 | 30.65582    | CVH |
| Sp4 | 103.3956132 | 35.66933    | CVH |
| Sp4 | 101.7136097 | 32.90822    | CVH |
| Sp4 | 103.8595898 | 31.68681    | CVH |
| Sp4 | 101.8872792 | 29.59938    | CVH |
| Sp4 | 117.184954  | 40.283223   | CVH |
| Sp4 | 107.9345709 | 35.50793    | CVH |
| Sp4 | 104.2495467 | 33.25759    | CVH |
| Sp4 | 101.286397  | 27.9346     | CVH |
| Sp4 | 101.9685467 | 30.05528    | CVH |
| Sp4 | 100.8294994 | 31.19334    | CVH |
| Sp4 | 102.2135021 | 31.91175    | CVH |
| Sp4 | 101.507299  | 29.000343   | CVH |
| Sp4 | 100.298406  | 29.037008   | CVH |
| Sp4 | 98.6728     | 29.2739     | CVH |
| Sp4 | 101.96483   | 30.055305   | CVH |
| Sp4 | 101.125234  | 30.979541   | CVH |
| Sp4 | 98.580912   | 31.80612    | CVH |
| Sp4 | 102.990174  | 32.061655   | CVH |
| Sp4 | 96.67       | 32.77       | CVH |
| Sp4 | 101.96191   | 30.02422    | CVH |
| Sp4 | 100.33      | 27.17       | CVH |
| Sp4 | 99.63       | 27.9        | CVH |

---

---

|     |            |           |     |
|-----|------------|-----------|-----|
| Sp4 | 101.22     | 28.9      | CVH |
| Sp4 | 101.52     | 29.4      | CVH |
| Sp4 | 101.43     | 29.4      | CVH |
| Sp4 | 102.05     | 30.05     | CVH |
| Sp4 | 102.03     | 30.05     | CVH |
| Sp4 | 101.63     | 30.3      | CVH |
| Sp4 | 101.72     | 30.32     | CVH |
| Sp4 | 100.157222 | 29.14     | CVH |
| Sp4 | 99.928333  | 29.141111 | CVH |
| Sp4 | 100.08222  | 29.28028  | CVH |
| Sp4 | 94.775056  | 29.771306 | CVH |
| Sp4 | 101.97     | 29.92     | CVH |
| Sp4 | 5.408055   | 50.956111 | CVH |
| Sp4 | 100.157    | 29.14     | CVH |
| Sp4 | 99.9283    | 29.1411   | CVH |
| Sp4 | 96.5236    | 31.8753   | CVH |
| Sp4 | 96.4608    | 31.9181   | CVH |
| Sp4 | 97.2667    | 32.0944   | CVH |
| Sp4 | 97.3472    | 32.7464   | CVH |
| Sp4 | 100.1572   | 29.14     | CVH |
| Sp4 | 99.706013  | 27.82308  | CVH |
| Sp4 | 99.286333  | 28.713041 | CVH |
| Sp4 | 99.79      | 28.93     | CVH |
| Sp4 | 99.79929   | 28.932073 | CVH |
| Sp4 | 98.593111  | 29.679906 | CVH |
| Sp4 | 99.107741  | 30.004589 | CVH |
| Sp4 | 101.014427 | 30.031529 | CVH |
| Sp4 | 96.91      | 30.05     | CVH |
| Sp4 | 101.865706 | 30.14136  | CVH |
| Sp4 | 100.311366 | 30.93917  | CVH |
| Sp4 | 102.364372 | 30.99903  | CVH |
| Sp4 | 98.218428  | 31.499202 | CVH |
| Sp4 | 102.206261 | 31.905842 | CVH |
| Sp4 | 100.978754 | 32.265516 | CVH |
| Sp4 | 102.961829 | 33.57587  | CVH |
| Sp4 | 103.481974 | 30.511499 | CVH |
| Sp4 | 96.523611  | 31.875278 | CVH |
| Sp4 | 97.266667  | 32.094444 | CVH |
| Sp4 | 97.347222  | 32.746389 | CVH |
| Sp4 | 101.5      | 27.42     | CVH |
| Sp4 | 101.279419 | 27.928607 | CVH |
| Sp4 | 98.911543  | 28.48611  | CVH |
| Sp4 | 97.46      | 28.66     | CVH |
| Sp4 | 97.84      | 29.67     | CVH |



|     |             |             |     |
|-----|-------------|-------------|-----|
| Sp4 | 100.26      | 29.99       | CVH |
| Sp4 | 99.1        | 30          | CVH |
| Sp4 | 101.96      | 30.05       | CVH |
| Sp4 | 101.86      | 30.14       | CVH |
| Sp4 | 102.81464   | 30.368117   | CVH |
| Sp4 | 97.56       | 30.65       | CVH |
| Sp4 | 95.82       | 30.74       | CVH |
| Sp4 | 102.54      | 30.91       | CVH |
| Sp4 | 102.546111  | 30.911944   | CVH |
| Sp4 | 100.31      | 30.93       | CVH |
| Sp4 | 102.36      | 30.99       | CVH |
| Sp4 | 97.18       | 31.13       | CVH |
| Sp4 | 98.82       | 31.21       | CVH |
| Sp4 | 100.67      | 31.39       | CVH |
| Sp4 | 93.67       | 31.48       | CVH |
| Sp4 | 98.21       | 31.49       | CVH |
| Sp4 | 98.58       | 31.8        | CVH |
| Sp4 | 100.97      | 32.26       | CVH |
| Sp4 | 99.334167   | 29.13806    | CVH |
| Sp4 | 100.082222  | 29.280279   | CVH |
| Sp4 | 94.979439   | 30.758329   | CVH |
| Sp4 | 98.961113   | 30.98361    | CVH |
| Sp5 | 108.03689   | 30.28898    | CVH |
| Sp5 | 99.80505957 | 28.93673348 | CVH |
| Sp5 | 100.4287392 | 28.80285809 | CVH |
| Sp5 | 100.3044616 | 29.04312156 | CVH |
| Sp5 | 99.2929842  | 28.71878005 | CVH |
| Sp5 | 99.79943    | 28.93554    | CVH |
| Sp5 | 100.34589   | 28.46027605 | CVH |
| Sp5 | 101.2514346 | 27.14011329 | CVH |
| Sp5 | 101.286397  | 27.93459856 | CVH |
| Sp5 | 100.324706  | 28.53999398 | CVH |
| Sp5 | 98.92445266 | 28.47008601 | CVH |
| Sp5 | 99.70744457 | 27.83576013 | CVH |
| Sp5 | 100.0788658 | 27.94593338 | CVH |
| Sp5 | 99.83991312 | 28.26407348 | CVH |
| Sp5 | 99.65450905 | 27.86037313 | CVH |
| Sp5 | 120.6750281 | 24.12403697 | CVH |
| Sp5 | 94.36805829 | 29.65404218 | CVH |
| Sp5 | 94.21993858 | 29.22091654 | CVH |
| Sp5 | 95.77390012 | 29.86506009 | CVH |
| Sp5 | 92.46896552 | 28.414019   | CVH |
| Sp5 | 97.47326975 | 28.66744414 | CVH |
| Sp5 | 90.866452   | 28.39163462 | CVH |

|     |             |             |     |
|-----|-------------|-------------|-----|
| Sp5 | 93.08136823 | 29.05190242 | CVH |
| Sp5 | 91.96375006 | 27.99700427 | CVH |
| Sp5 | 91.12082392 | 29.65004027 | CVH |
| Sp5 | 95.78329492 | 29.81903179 | CVH |
| Sp5 | 93.2524198  | 29.89136762 | CVH |
| Sp5 | 94.65788758 | 29.62730603 | CVH |
| Sp5 | 93.37977248 | 28.86645647 | CVH |
| Sp5 | 96.60671719 | 31.21779311 | CVH |
| Sp5 | 99.707778   | 28.008889   | CVH |
| Sp5 | 99.760833   | 28.327222   | CVH |
| Sp5 | 94          | 29          | CVH |
| Sp5 | 93.783333   | 29          | CVH |
| Sp5 | 99.706013   | 27.82308    | CVH |
| Sp5 | 90.82       | 28.2        | CVH |
| Sp5 | 98.911543   | 28.48611    | CVH |
| Sp5 | 97.46       | 28.66       | CVH |
| Sp5 | 99.28       | 28.71       | CVH |
| Sp5 | 99.79       | 28.93       | CVH |
| Sp5 | 93.07       | 29.04       | CVH |
| Sp5 | 94.36       | 29.63       | CVH |
| Sp5 | 91.12       | 29.65       | CVH |
| Sp5 | 95.76       | 29.85       | CVH |
| Sp5 | 93.24       | 29.88       | CVH |
| Sp5 | 107.890946  | 30.317053   | CVH |
| Sp5 | 0.447668    | 51.072846   | CVH |
| Sp5 | 98.78916    | 28.39       | CVH |
| Sp5 | 88.9        | 27.466667   | CVH |
| Sp5 | 93.9        | 29.133333   | CVH |
| Sp5 | 94.633333   | 29.45       | CVH |
| Sp5 | 94.916667   | 29.633333   | CVH |

---

The codes of nature reserves with high probability of potential distribution of five *Picea* species under current and predicted climate.

Sp1: *P. brachytyla*; Sp2: *P. brachytyla* var. *comparata*; Sp3: *P. likiangensis*; Sp4: *P. likiangensis* var. *rubescens*; Sp5: *P. likiangensis* var. *linzhiensis*.

Table S2. The predicted distribution area of *Picea* species under the current climate and the future climate of the two emission scenarios.

| Code | Nature reserves           | Current | ssp2-4.5 | ssp5-8.5 |
|------|---------------------------|---------|----------|----------|
| 4    | Ji'an                     | 0       | 0        | 1        |
| 6    | Dabie Mountain, Henan     | 1       | 0        | 0        |
| 7    | Dasha River               | 3       | 3        | 2        |
| 11   | Gujing Garden             | 1       | 1        | 1        |
| 12   | Fujian Emei peak          | 1       | 0        | 0        |
| 13   | Dalaoling                 | 2       | 2        | 2        |
| 14   | Mapan yongcuo wetland     | 2       | 2        | 2        |
| 15   | Duoer                     | 6       | 6        | 6        |
| 16   | Buddha top mountain       | 1       | 1        | 0        |
| 17   | Gao Leshan                | 1       | 1        | 1        |
| 20   | Louzi mountain, Liaoning  | 0       | 0        | 1        |
| 21   | Medica wetland            | 8       | 8        | 8        |
| 28   | Nanhe                     | 3       | 3        | 3        |
| 29   | Ting Jiangyuan            | 1       | 0        | 0        |
| 33   | Yunkai Mountain           | 2       | 2        | 0        |
| 34   | Thousand Buddhas Mountain | 1       | 1        | 1        |
| 35   | Nanhua mountain           | 2       | 2        | 2        |
| 37   | Cymbal mountain           | 2       | 1        | 0        |
| 38   | Taikuan River             | 2       | 2        | 2        |
| 39   | Qinglong River            | 0       | 0        | 1        |
| 40   | Southerly side            | 2       | 2        | 0        |
| 41   | Changyang bengjianzi      | 2       | 2        | 2        |
| 42   | Wudaoxia                  | 4       | 4        | 4        |
| 43   | Motianling, Shaanxi       | 1       | 1        | 1        |
| 49   | Five flower top           | 0       | 0        | 1        |
| 51   | Namoga wetland            | 3       | 3        | 3        |
| 58   | Dabie Mountains           | 1       | 0        | 0        |
| 59   | Padang golden monkey      | 1       | 1        | 1        |
| 63   | Baihe                     | 2       | 2        | 2        |
| 66   | Gu Niujiang               | 1       | 1        | 0        |
| 67   | Jinzhai Tianma            | 6       | 6        | 6        |
| 71   | Yaoluoping                | 2       | 1        | 1        |
| 72   | White Horse Snow Mountain | 29      | 29       | 29       |
| 73   | Beijing Songshan          | 0       | 0        | 1        |
| 74   | Cangshan Erhai Lake       | 9       | 9        | 6        |
| 76   | Huboliao                  | 1       | 1        | 0        |
| 78   | Liang Yeshan              | 2       | 2        | 0        |
| 79   | Jiangle Longqi Mountain   | 2       | 2        | 0        |
| 80   | Plum blossom mountain     | 3       | 3        | 0        |
| 82   | Tianbaoyan                | 1       | 1        | 0        |

|     |                                                     |    |    |    |
|-----|-----------------------------------------------------|----|----|----|
| 83  | Wuyishan, Fujian                                    | 7  | 4  | 0  |
| 84  | Rare marine species in Xiamen                       | 1  | 1  | 0  |
| 86  | Annan dam Wild Camel                                | 0  | 0  | 39 |
| 87  | Baishuijiang                                        | 27 | 27 | 27 |
| 89  | Gahai zecha                                         | 5  | 5  | 5  |
| 90  | Liancheng                                           | 5  | 5  | 5  |
| 92  | Lianhua Mountain, Gansu                             | 2  | 2  | 2  |
| 93  | Taitong Kongtong mountain                           | 2  | 2  | 2  |
| 94  | Xiaolongshan                                        | 4  | 4  | 4  |
| 95  | Yanchi Bay                                          | 0  | 0  | 20 |
| 96  | Gaoligong Mountain                                  | 50 | 50 | 44 |
| 97  | Chebaling                                           | 1  | 1  | 0  |
| 102 | Nanling                                             | 6  | 4  | 0  |
| 103 | Xiangtou Mountain                                   | 1  | 0  | 0  |
| 107 | Cenwanglao mountain                                 | 3  | 3  | 0  |
| 108 | Dayaoshan                                           | 1  | 0  | 0  |
| 111 | Huaping                                             | 1  | 1  | 0  |
| 112 | Jinzhong mountain black necked long tailed pheasant | 3  | 3  | 0  |
| 113 | Jiuwanshan                                          | 3  | 3  | 0  |
| 114 | Maoer Mountain                                      | 1  | 0  | 0  |
| 115 | Munlun                                              | 1  | 1  | 0  |
| 117 | Qianjiadong                                         | 1  | 1  | 0  |
| 119 | Shiwan Mountain                                     | 3  | 0  | 0  |
| 121 | Alsophila spinulosa                                 | 1  | 1  | 0  |
| 122 | Fanjing Mountain                                    | 7  | 6  | 5  |
| 123 | Wide water                                          | 4  | 4  | 4  |
| 124 | Lei Gongshan                                        | 7  | 7  | 2  |
| 125 | Ma-yangHo                                           | 3  | 3  | 0  |
| 126 | Maolan                                              | 2  | 2  | 0  |
| 127 | Subtropical evergreen broad-leaved forest in Xishui | 7  | 7  | 5  |
| 139 | Changli Gold Coast                                  | 0  | 0  | 1  |
| 140 | Geological relics of Liujiang Basin                 | 0  | 1  | 1  |
| 141 | Maojing dam                                         | 0  | 0  | 1  |
| 143 | Saihan dam                                          | 0  | 0  | 1  |
| 144 | Wuling Mountain, Hebei                              | 0  | 0  | 1  |
| 145 | Xiaowutai Mountain                                  | 0  | 1  | 4  |
| 146 | Bao Tianman                                         | 1  | 1  | 1  |
| 147 | Danjiang wetland                                    | 5  | 5  | 5  |
| 148 | Dong Zhai                                           | 4  | 0  | 0  |
| 149 | Funiu Mountain                                      | 9  | 9  | 9  |
| 151 | Liankang mountain                                   | 1  | 0  | 0  |
| 152 | macaca mulatta                                      | 9  | 9  | 9  |
| 153 | Xiaoqinling                                         | 1  | 1  | 1  |
| 173 | Wufenghou River                                     | 7  | 7  | 7  |

|     |                                      |     |     |     |
|-----|--------------------------------------|-----|-----|-----|
| 174 | Jiugong Mountain                     | 1   | 1   | 0   |
| 176 | Seven sisters mountain               | 4   | 4   | 4   |
| 178 | Shennongjia                          | 10  | 10  | 10  |
| 179 | Xingdou Mountain                     | 9   | 9   | 9   |
| 180 | badagongshan mountain                | 4   | 4   | 2   |
| 181 | Bamianshan                           | 1   | 1   | 0   |
| 183 | Huping mountain                      | 9   | 9   | 4   |
| 185 | Mangshan                             | 3   | 2   | 0   |
| 187 | Yanling Taoyuan cave                 | 1   | 1   | 0   |
| 193 | Jilin Changbai Mountain              | 0   | 0   | 2   |
| 195 | Hunchun Amur tiger                   | 1   | 2   | 6   |
| 198 | Tianfo Zhishan                       | 0   | 0   | 4   |
| 206 | Jiulian Mountain                     | 1   | 1   | 0   |
| 210 | Wuyishan, Jiangxi                    | 2   | 1   | 0   |
| 213 | Dalian spotted seal                  | 1   | 1   | 1   |
| 218 | Dandong Yalu River Estuary Wetland   | 1   | 1   | 2   |
| 225 | Daqingshan, Inner Mongolia           | 0   | 0   | 6   |
| 232 | Heili River                          | 0   | 0   | 2   |
| 241 | Lingwu Baiji Beach                   | 0   | 0   | 1   |
| 242 | Haba Lake                            | 0   | 0   | 6   |
| 243 | Liupanshan                           | 10  | 10  | 10  |
| 244 | Luoshan, Ningxia                     | 0   | 3   | 4   |
| 245 | Shapotou                             | 0   | 0   | 3   |
| 246 | Hoh Xil                              | 3   | 26  | 74  |
| 247 | Longbao                              | 1   | 1   | 1   |
| 248 | Qinghai Lake                         | 26  | 28  | 28  |
| 249 | Sanjiangyuan                         | 336 | 489 | 508 |
| 250 | Xunhua Mengda                        | 2   | 2   | 2   |
| 251 | Binzhou shellfish island and wetland | 0   | 0   | 2   |
| 256 | Lishan                               | 2   | 2   | 2   |
| 257 | Luya Mountain                        | 3   | 4   | 4   |
| 258 | Pangquangou                          | 2   | 2   | 2   |
| 259 | Wulu mountain                        | 3   | 3   | 3   |
| 260 | Evergreen                            | 6   | 6   | 6   |
| 261 | Foping                               | 4   | 4   | 4   |
| 262 | Hanzhong Crested Ibis                | 8   | 8   | 8   |
| 263 | Hualongshan                          | 4   | 4   | 4   |
| 264 | Cattle back beam                     | 3   | 3   | 3   |
| 265 | Taibai Mountain                      | 7   | 7   | 7   |
| 266 | Tianhua mountain                     | 2   | 2   | 2   |
| 267 | Zhou Zhi                             | 6   | 6   | 6   |
| 268 | Ziwuling, Shaanxi                    | 6   | 6   | 6   |
| 271 | Baishui River                        | 5   | 5   | 5   |
| 272 | Chaqingsong white lipped deer        | 1   | 1   | 1   |

|     |                                                                  |     |     |      |
|-----|------------------------------------------------------------------|-----|-----|------|
| 273 | Rare and endemic fish in the upper reaches of the Yangtze River  | 16  | 15  | 8    |
| 274 | Changning Bamboo Sea                                             | 3   | 3   | 0    |
| 275 | Fengtongzhai                                                     | 4   | 4   | 4    |
| 276 | Gongga Mountain                                                  | 18  | 18  | 18   |
| 277 | Haizi Mountain                                                   | 5   | 5   | 5    |
| 278 | Calyx mountain                                                   | 7   | 7   | 7    |
| 279 | Sketch Creek                                                     | 3   | 3   | 0    |
| 280 | jiuzhaigou                                                       | 3   | 3   | 3    |
| 281 | Longxi Hongkou                                                   | 3   | 3   | 3    |
| 282 | Mabian gale top                                                  | 5   | 5   | 5    |
| 283 | Meigu gale top                                                   | 5   | 5   | 5    |
| 284 | Micang mountain                                                  | 4   | 4   | 4    |
| 285 | Panzhihuaensis Cycas                                             | 1   | 1   | 1    |
| 286 | Ruoergai wetland                                                 | 18  | 18  | 18   |
| 287 | Xiaojin Siguniang mountain                                       | 6   | 6   | 6    |
| 288 | Tangjiahe                                                        | 5   | 5   | 5    |
| 289 | Wang Lang                                                        | 3   | 3   | 3    |
| 290 | Wolong                                                           | 15  | 15  | 15   |
| 291 | Xuebaoding                                                       | 8   | 8   | 8    |
| 292 | Aden                                                             | 9   | 9   | 9    |
| 295 | Chayu Ciba ditch                                                 | 8   | 8   | 8    |
| 297 | Mangkang Yunnan snub nosed monkey                                | 20  | 20  | 20   |
| 298 | Qiangtang                                                        | 73  | 347 | 1460 |
| 299 | Selincu                                                          | 142 | 142 | 142  |
| 300 | Yarlung Zangbo Grand Canyon                                      | 77  | 77  | 69   |
| 301 | Black necked Crane in the middle reaches of Yarlung Zangbo River | 19  | 19  | 19   |
| 302 | Mount Qomolangma                                                 | 65  | 65  | 65   |
| 303 | Altun Mountain                                                   | 0   | 4   | 63   |
| 308 | Lop Nur Wild Camel                                               | 0   | 0   | 118  |
| 310 | peak Pobedy                                                      | 0   | 1   | 13   |
| 311 | Ailao Mountain                                                   | 2   | 2   | 2    |
| 312 | Dashanbao black necked Crane                                     | 3   | 3   | 3    |
| 313 | Jinpingling                                                      | 4   | 4   | 2    |
| 314 | Huanglianshan                                                    | 7   | 6   | 0    |
| 315 | Naban River Basin                                                | 3   | 3   | 0    |
| 316 | Nangunhe                                                         | 6   | 6   | 0    |
| 317 | Wenshan                                                          | 3   | 3   | 2    |
| 318 | Wuliang Mountain                                                 | 4   | 4   | 4    |
| 319 | Xishuangbanna                                                    | 12  | 0   | 0    |
| 320 | Yaoshan                                                          | 3   | 3   | 3    |
| 321 | Yongde Snow Mountain                                             | 1   | 1   | 1    |
| 324 | Fengyang mountain Baishanzu                                      | 2   | 2   | 0    |

|     |                                       |    |    |    |
|-----|---------------------------------------|----|----|----|
| 326 | Zhejiang Jiulongshan                  | 1  | 1  | 0  |
| 328 | Wuyanling                             | 1  | 0  | 0  |
| 329 | Daba Mountain                         | 20 | 20 | 20 |
| 330 | Jinfoshan                             | 7  | 7  | 5  |
| 332 | Camel beam                            | 0  | 2  | 3  |
| 333 | Qingya Village                        | 3  | 3  | 3  |
| 338 | Gexi ditch                            | 4  | 4  | 4  |
| 339 | Changsha Gongma                       | 7  | 17 | 22 |
| 340 | Heizhugou                             | 7  | 7  | 7  |
| 341 | Laojun Mountain                       | 1  | 1  | 1  |
| 342 | Black tea mountain                    | 2  | 3  | 3  |
| 343 | Amaryllaceae                          | 2  | 2  | 0  |
| 344 | Chongzuo white headed langur          | 2  | 0  | 0  |
| 346 | Xuebao mountain                       | 3  | 3  | 3  |
| 347 | Yintiaoling                           | 2  | 2  | 2  |
| 348 | Hunan Shunhuangshan                   | 1  | 1  | 1  |
| 352 | Jiaozi mountain                       | 2  | 2  | 2  |
| 353 | Yunlong Tianchi                       | 1  | 1  | 1  |
| 354 | Yuanjiang                             | 4  | 4  | 0  |
| 357 | Prince Edward Hill                    | 9  | 9  | 9  |
| 358 | Taohe River                           | 22 | 22 | 22 |
| 359 | Anhui Qingliangfeng                   | 1  | 1  | 0  |
| 360 | Shimen platform                       | 4  | 2  | 0  |
| 366 | Qi Yunshan                            | 3  | 0  | 0  |
| 367 | White Wolf mountain                   | 0  | 0  | 2  |
| 368 | Saiwudang                             | 3  | 3  | 3  |
| 370 | Wood forest                           | 2  | 2  | 2  |
| 371 | Zibai mountain                        | 3  | 3  | 3  |
| 372 | Hancheng Huanglongshan Brown pheasant | 5  | 5  | 5  |
| 373 | Yan'an Huanglongshan Brown pheasant   | 12 | 12 | 12 |
| 374 | Micang mountain, Shaanxi              | 5  | 5  | 5  |
| 375 | Qingmuchuan                           | 2  | 2  | 2  |
| 376 | Mulberry garden                       | 1  | 1  | 1  |
| 385 | Upper reaches of Luanhe River         | 0  | 0  | 1  |
| 389 | Baihua Mountain                       | 0  | 1  | 5  |
| 390 | Baxian Mountain                       | 0  | 0  | 2  |
| 393 | Helan Mountain, Inner Mongolia        | 0  | 1  | 10 |
| 399 | Yancheng Wetland rare birds           | 3  | 0  | 0  |
| 401 | Xiongjiang Huangchu forest            | 1  | 0  | 0  |
| 402 | Kunyu Mountain                        | 1  | 1  | 1  |
| 403 | Nanyang dinosaur egg fossil group     | 20 | 20 | 20 |
| 406 | Daming Mountain                       | 1  | 0  | 0  |
| 407 | Rare aquatic animals in nuoshui River | 1  | 1  | 1  |
| 408 | Huize black necked Crane              | 2  | 2  | 2  |

|       |                                                          |      |      |      |
|-------|----------------------------------------------------------|------|------|------|
| 409   | Wuqi like red deer                                       | 4    | 4    | 4    |
| 411   | Taibaishui River                                         | 4    | 4    | 4    |
| 418   | Mangdang Mountain                                        | 2    | 0    | 0    |
| 419   | Ganjiang River source                                    | 1    | 1    | 0    |
| 421   | Blocking the river source                                | 5    | 5    | 5    |
| 423   | White Cloud Mountain                                     | 4    | 2    | 0    |
| 424   | Luokeng Crocodile Lizard                                 | 1    | 0    | 0    |
| 426   | Wulipo                                                   | 6    | 6    | 6    |
| 427   | Xiaozhaizigou                                            | 7    | 7    | 7    |
| 428   | Huangbaiyuan                                             | 1    | 1    | 1    |
| 429   | Pingheliang                                              | 1    | 1    | 1    |
| 430   | Rare aquatic animals in Lueyang                          | 2    | 2    | 2    |
| 432   | Qaidam Haloxylon ammodendron forest                      | 2    | 33   | 54   |
| 433   | Yunwu Mountain                                           | 1    | 1    | 1    |
| 434   | Lingkong mountain                                        | 1    | 1    | 1    |
| 442   | Eighteen mile long Gorge                                 | 3    | 3    | 3    |
| 444   | Jiuyi mountain                                           | 1    | 1    | 0    |
| 445   | Jintong mountain                                         | 3    | 2    | 0    |
| 448   | Liziping                                                 | 5    | 5    | 5    |
| 449   | Wumeng Mountain                                          | 3    | 3    | 2    |
| 450   | Old county                                               | 2    | 2    | 2    |
| 451   | Guanyin Mountain                                         | 2    | 2    | 2    |
| 452   | The first song of the Yellow River                       | 21   | 21   | 21   |
| 453   | Datong Beichuan river source area                        | 3    | 3    | 3    |
| 454   | Danxia landform of Huoshizhai                            | 2    | 2    | 2    |
| 456   | En City                                                  | 2    | 0    | 0    |
| 457   | Qilian Mountain, Gansu                                   | 57   | 80   | 112  |
| 461   | Yellow River Delta                                       | 0    | 0    | 1    |
| 466   | Dawei Mountain, Yunnan                                   | 8    | 8    | 0    |
| 467   | Xinglong mountain                                        | 3    | 3    | 3    |
| 468   | Helan Mountain                                           | 0    | 1    | 15   |
| 470   | Henan Yellow River Wetland                               | 5    | 5    | 5    |
| 471   | Minjiang River source                                    | 1    | 0    | 0    |
| 472   | Anxi extremely arid desert                               | 0    | 0    | 7    |
| 478   | Shaanxi Heihe rare aquatic animal reserve                | 17   | 17   | 17   |
| 479   | Shaanxi Danfeng Wuguan River rare aquatic animal reserve | 7    | 7    | 7    |
| Total |                                                          | 1748 | 2221 | 3648 |

The numbers in columns current, ssp2-4.5 and ssp5-8.5 represent the count value of the predicted distribution of *Picea* species in the nature reserve. The larger the count value, the larger the distribution area of *Picea* species. Code represents the number of the nature reserve.
